# Supplementary material
Source: PubMed Central journal article supplement (PMC4793844)
Supplement: leem019969.ww1_default.pdf [file leem019969.ww1_default.pdf]

## Appendix 1: Supplementary tables [posted as supplied by author]

Table A - First-incident hard atherosclerotic cardiovascular events during follow-up

|                                                | Rotterdam Study I<br>n = 6045 |                     |                     | Rotterdam Study II<br>n = 2374 |                   |
|------------------------------------------------|-------------------------------|---------------------|---------------------|--------------------------------|-------------------|
|                                                | Total<br>n = 8419             | Men<br>n = 2287     | Women<br>n = 3758   | Men<br>n = 1006                | Women<br>n = 1368 |
| <b>First-incident event:</b>                   |                               |                     |                     |                                |                   |
| hard atherosclerotic cardiovascular disease    | 1700 (20.2)                   | 660 (28.9)          | 836 (22.2)          | 102 (10.1)                     | 102 (7.5)         |
| hard coronary heart disease                    | 766 (9.1)                     | 348 (15.2)          | 316 (8.4)           | 63 (6.3)                       | 39 (2.9)          |
| • <i>myocardial infarction</i>                 | 565 (6.7)                     | 256 (11.2)          | 219 (5.8)           | 53 (5.3)                       | 37 (2.7)          |
| • <i>definite fatal coronary heart disease</i> | 201 (2.4)                     | 92 (4.0)            | 97 (2.6)            | 10 (1.0)                       | 2 (0.1)           |
| non-haemorrhagic stroke                        | 869 (10.3)                    | 280 (12.2)          | 494 (13.1)          | 36 (3.6)                       | 59 (4.3)          |
| • <i>ischaemic stroke</i>                      | 528 (6.3)                     | 180 (7.9)           | 275 (7.3)           | 29 (2.9)                       | 44 (3.2)          |
| • <i>unspecified stroke</i>                    | 341 (4.1)                     | 100 (4.4)           | 219 (5.8)           | 7 (0.7)                        | 15 (1.1)          |
| other atherosclerotic cardiovascular death     | 65 (0.8)                      | 32 (1.4)            | 26 (0.7)            | 3 (0.3)                        | 4 (0.3)           |
| non-atherosclerotic death                      | 2486 (29.5)                   | 897 (39.2)          | 1328 (35.3)         | 133 (13.2)                     | 128 (9.4)         |
| no event (censored alive)                      | 4233 (50.3)                   | 730 (31.9)          | 1594 (42.4)         | 771 (76.6)                     | 1138 (83.2)       |
| <b>Follow-up time:</b>                         |                               |                     |                     |                                |                   |
| total person-time, yrs                         | 96,363                        | 26,760              | 49,032              | 8540                           | 12,032            |
| median (25th to 75th percentile), y            | 10.5 (7.9 to 17.0)            | 12.8 (6.3 to 17.5)  | 15.5 (8.1 to 18.0)  | 9.2 (8.0 to 10.1)              | 9.3 (8.3 to 10.1) |
| median (25th to 75th percentile), y *          | 16.0 (9.7 to 18.1)            | 17.9 (17.0 to 18.7) | 18.0 (17.4 to 18.9) | 9.7 (8.7 to 10.2)              | 9.6 (8.7 to 10.2) |

Values are number of participants (percentages) unless stated otherwise.

\* Median follow-up for participants censored alive.

**Table B - Age of first-incident cardiovascular event or non-cardiovascular death**

| <b>First-incident event</b> | <b>Men</b><br>n = 3293 | <b>Women</b><br>n = 5126 | <b>P-value *</b> |
|-----------------------------|------------------------|--------------------------|------------------|
| cardiovascular disease      | 75.8 (8.3)             | 80.2 (8.9)               | < 0.001          |
| coronary heart disease      | 73.1 (8.1)             | 78.7 (9.5)               | < 0.001          |
| cerebrovascular disease     | 76.4 (8.0)             | 79.8 (8.8)               | 0.009            |
| heart failure               | 78.1 (7.8)             | 81.7 (8.2)               | 0.006            |
| other CVD death             | 80.0 (8.4)             | 84.0 (7.4)               | 0.17             |
| non-cardiovascular death    | 78.8 (8.4)             | 82.7 (9.5)               | < 0.001          |

Values are mean (standard deviation) age in years of occurrence of first-incident cardiovascular event or competing non-cardiovascular death during follow-up among men and women. Coronary heart disease was defined as myocardial infarction, coronary revascularisation, or death due to coronary heart disease. Cerebrovascular disease was defined as stroke, transient ischaemic attack, or carotid revascularisation. Other cardiovascular death included all cardiovascular mortality other than fatal coronary heart disease or stroke.

\* Adjusted for age at start of follow-up and cohort.

**Table C - Hazard ratios for cardiovascular disease and non-cardiovascular death for women compared to men by cohort**

|                            | Rotterdam Study I<br>n = 6045        |                                        | Rotterdam Study II<br>n = 2374       |                                        |
|----------------------------|--------------------------------------|----------------------------------------|--------------------------------------|----------------------------------------|
|                            | Traditional Cox model<br>HR (95% CI) | Competing risks model *<br>HR (95% CI) | Traditional Cox model<br>HR (95% CI) | Competing risks model *<br>HR (95% CI) |
| <b>Model 1:</b>            |                                      |                                        |                                      |                                        |
| cardiovascular disease     | 0.75 (0.69 to 0.81)                  | 0.81 (0.75 to 0.87)                    | 0.76 (0.62 to 0.94)                  | 0.78 (0.63 to 0.97)                    |
| coronary heart disease     | 0.49 (0.43 to 0.57)                  | 0.54 (0.47 to 0.63)                    | 0.39 (0.27 to 0.57)                  | 0.40 (0.28 to 0.58)                    |
| cerebrovascular disease    | 0.93 (0.82 to 1.06)                  | 1.08 (0.93 to 1.22)                    | 1.56 (1.09 to 2.22)                  | 1.65 (1.16 to 2.36)                    |
| heart failure              | 0.87 (0.74 to 1.01)                  | 0.98 (0.84 to 1.14)                    | 0.53 (0.32 to 0.87)                  | 0.55 (0.34 to 0.90)                    |
| other cardiovascular death | 0.59 (0.39 to 0.89)                  | 0.69 (0.46 to 1.04)                    | 2.63 (0.56 to 12.43) †               | 2.88 (0.62 to 13.50) †                 |
| non-cardiovascular death   | 0.70 (0.63 to 0.78)                  | 0.80 (0.72 to 0.89)                    | 0.55 (0.40 to 0.74)                  | 0.57 (0.42 to 0.77)                    |
| <b>Model 2:</b>            |                                      |                                        |                                      |                                        |
| cardiovascular disease     | 0.61 (0.56 to 0.67)                  | 0.73 (0.67 to 0.80)                    | 0.68 (0.54 to 0.85)                  | 0.72 (0.57 to 0.91)                    |
| coronary heart disease     | 0.44 (0.38 to 0.51)                  | 0.53 (0.46 to 0.62)                    | 0.35 (0.24 to 0.51)                  | 0.36 (0.24 to 0.53)                    |
| cerebrovascular disease    | 0.77 (0.68 to 0.88)                  | 1.02 (0.90 to 1.16)                    | 1.36 (0.94 to 1.99)                  | 1.42 (1.00 to 2.04)                    |
| heart failure              | 0.64 (0.54 to 0.75)                  | 0.83 (0.71 to 0.98)                    | 0.44 (0.27 to 0.75)                  | 0.53 (0.30 to 0.91)                    |
| other cardiovascular death | 0.44 (0.28 to 0.67)                  | 0.62 (0.41 to 0.94)                    | 2.90 (0.58 to 14.52) †               | NA                                     |
| non-cardiovascular death   | 0.52 (0.46 to 0.58)                  | 0.69 (0.62 to 0.77)                    | 0.49 (0.35 to 0.68)                  | 0.50 (0.36 to 0.70)                    |
| <b>Model 3:</b>            |                                      |                                        |                                      |                                        |
| cardiovascular disease     | 0.67 (0.61 to 0.75)                  | 0.76 (0.69 to 0.85)                    | 0.74 (0.57 to 0.95)                  | 0.77 (0.60 to 0.99)                    |
| coronary heart disease     | 0.46 (0.38 to 0.55)                  | 0.53 (0.44 to 0.64)                    | 0.41 (0.26 to 0.63)                  | 0.43 (0.28 to 0.66)                    |
| cerebrovascular disease    | 0.92 (0.78 to 1.07)                  | 1.13 (0.97 to 1.32)                    | 1.38 (0.90 to 2.09)                  | 1.45 (0.99 to 2.14)                    |
| heart failure              | 0.64 (0.52 to 0.78)                  | 0.77 (0.63 to 0.95)                    | 0.52 (0.28 to 0.97)                  | 0.56 (0.30 to 1.05)                    |
| other cardiovascular death | 0.57 (0.33 to 0.98)                  | 0.77 (0.48 to 1.23)                    | 5.40 (0.81 to 36.13) †               | NA                                     |
| non-cardiovascular death   | 0.64 (0.56 to 0.73)                  | 0.78 (0.68 to 0.90)                    | 0.56 (0.39 to 0.81)                  | 0.55 (0.38 to 0.81)                    |

Values are hazard ratios (95% confidence intervals) for the risk of a first-incident cardiovascular event or competing non-cardiovascular death associated with sex, where men served as the reference category. All regression analyses used follow-up time as the time scale. Coronary heart disease was defined as myocardial infarction, coronary revascularisation, or death due to coronary heart disease. Cerebrovascular disease was defined as stroke, transient ischaemic attack, or carotid revascularisation. Other cardiovascular death included all cardiovascular mortality other than fatal coronary heart disease or stroke. NA = not applicable due to non-converging models (only 2 events in men).

Model 1: unadjusted.

Model 2: adjusted for age (linear covariate) and level of education.

Model 3: adjusted for age (linear covariate), level of education, systolic and diastolic blood pressure, total and HDL-cholesterol levels, diabetes mellitus, smoking status, family history of premature myocardial infarction, body mass index, C-reactive protein level, use of blood pressure lowering medication, and use of statins.

\* Fine and Gray methodology for subdistribution regression with competing risks.<sup>20</sup>

† Interpret with caution, only 2 events in men.

**Table D - Age of first-incident hard atherosclerotic cardiovascular event or non-atherosclerotic death**

| <b>First-incident event</b>                 | <b>Men</b><br>n = 3293 | <b>Women</b><br>n = 5126 | <b>P-value *</b> |
|---------------------------------------------|------------------------|--------------------------|------------------|
| hard atherosclerotic cardiovascular disease | 76.6 (8.6)             | 81.5 (8.7)               | < 0.001          |
| hard coronary heart disease                 | 75.3 (8.6)             | 79.9 (9.1)               | < 0.001          |
| non-haemorrhagic stroke                     | 78.0 (8.5)             | 82.4 (8.4)               | 0.022            |
| other atherosclerotic cardiovascular death  | 78.7 (7.7)             | 84.0 (6.8)               | 0.016            |
| non-atherosclerotic death                   | 80.0 (8.1)             | 84.0 (9.1)               | < 0.001          |

Values are mean (standard deviation) age in years of occurrence of first-incident hard atherosclerotic cardiovascular event or competing non-atherosclerotic death during follow-up among men and women. Hard coronary heart disease was defined as myocardial infarction or death due to coronary heart disease. Other atherosclerotic cardiovascular death included all atherosclerotic cardiovascular mortality other than fatal coronary heart disease or non-haemorrhagic stroke.

\* Adjusted for age at start of follow-up and cohort.

**Table E - Remaining lifetime risks of nonfatal and fatal first-incident manifestation of cardiovascular disease at different ages**

|                                 | Lifetime Risk        |                      | P-value | Excess events per 1000 women |
|---------------------------------|----------------------|----------------------|---------|------------------------------|
|                                 | Men                  | Women                |         |                              |
| <b>Risk at 55 years of age:</b> | n = 3293             | n = 5126             |         |                              |
| cardiovascular disease          | 67.1% (64.7 to 69.5) | 66.4% (64.2 to 68.7) | 0.34    | -7                           |
| nonfatal event                  | 55.1% (52.3 to 57.8) | 52.6% (49.9 to 55.2) | 0.101   | -25                          |
| fatal event                     | 12.1% (10.5 to 13.6) | 13.9% (12.4 to 15.3) | 0.047   | 18                           |
| <b>Risk at 65 years of age:</b> | n = 3001             | n = 4832             |         |                              |
| cardiovascular disease          | 63.4% (61.1 to 65.7) | 65.6% (63.7 to 67.5) | 0.077   | 22                           |
| nonfatal event                  | 50.5% (48.1 to 52.9) | 50.4% (48.5 to 52.4) | 0.49    | -1                           |
| fatal event                     | 12.9% (11.3 to 14.5) | 15.1% (13.7 to 16.5) | 0.021   | 22                           |
| <b>Risk at 75 years of age:</b> | n = 1648             | n = 3180             |         |                              |
| cardiovascular disease          | 58.7% (55.8 to 61.6) | 63.4% (61.2 to 65.6) | 0.006   | 48                           |
| nonfatal event                  | 42.9% (40.0 to 45.9) | 46.4% (44.1 to 48.7) | 0.033   | 35                           |
| fatal event                     | 15.8% (13.6 to 17.9) | 17.0% (15.3 to 18.8) | 0.182   | 13                           |
| <b>Risk at 85 years of age:</b> | n = 438              | n = 1296             |         |                              |
| cardiovascular disease          | 52.0% (46.6 to 57.3) | 57.1% (53.9 to 60.3) | 0.054   | 51                           |
| nonfatal event                  | 33.9% (28.8 to 39.0) | 36.1% (33.0 to 39.2) | 0.23    | 22                           |
| fatal event                     | 18.1% (14.0 to 22.2) | 21.0% (18.4 to 23.6) | 0.123   | 29                           |

Values are remaining lifetime risks (95% confidence interval) of occurrence of first-incident nonfatal or fatal cardiovascular event adjusted for competing non-cardiovascular death among men and women at different ages. A first-incident manifestation of cardiovascular disease was considered fatal if death occurred within 28 days of the event and death was attributed to cardiovascular disease. Excess risk was computed as the absolute difference in remaining lifetime risk between men and women
