# Supplementary material
Source: PubMed Central journal article supplement (PMC4793844)
Supplement: leem019969.ww2_default.pdf [file leem019969.ww2_default.pdf]

Appendix 2: Supplementary figures [posted as supplied by author]

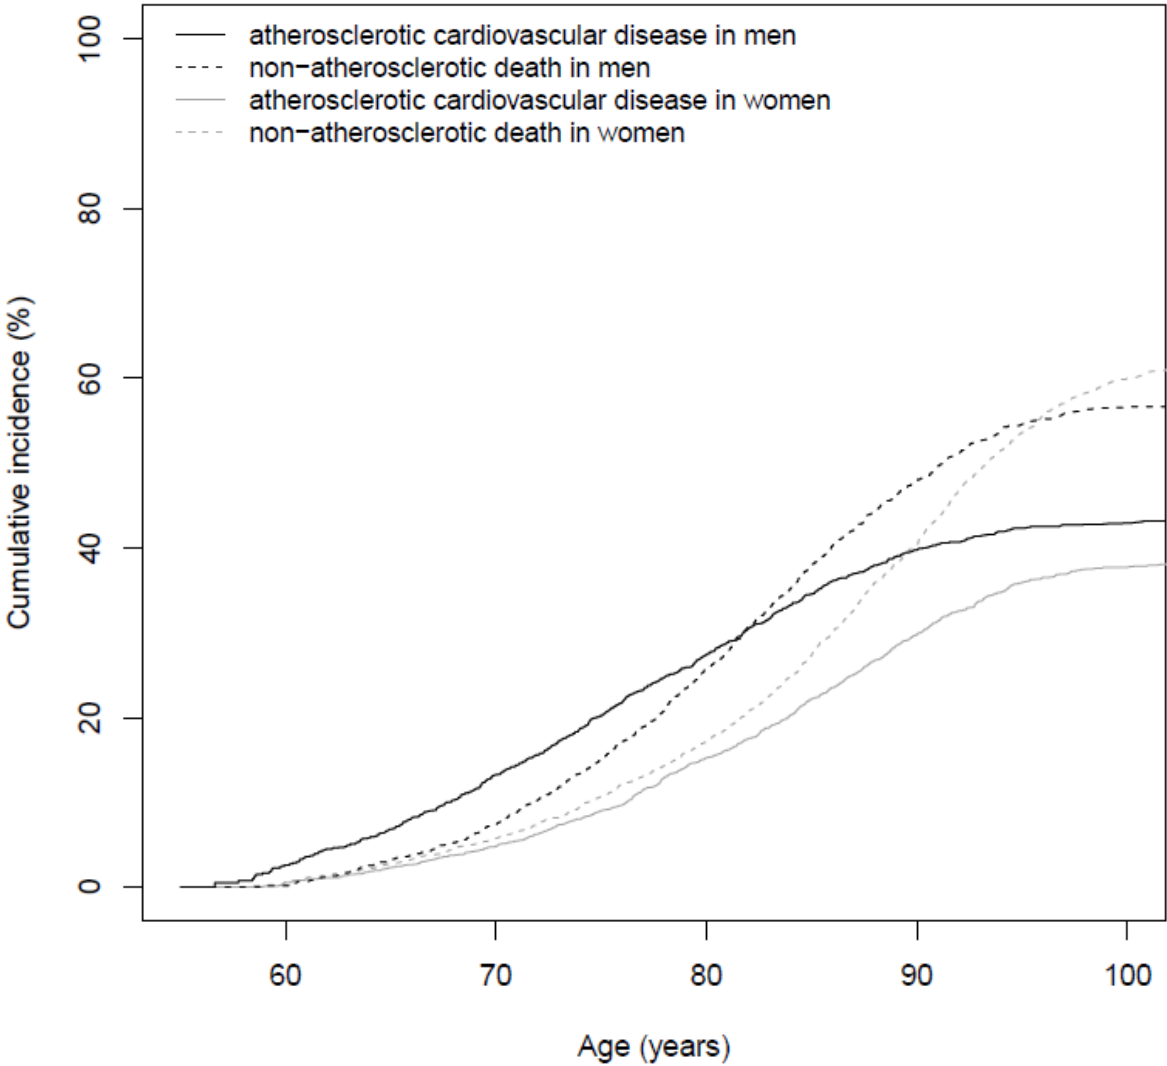

**Fig A** Cumulative incidence of hard atherosclerotic cardiovascular disease (defined as hard coronary heart disease, non-haemorrhagic stroke, and other atherosclerotic cardiovascular death) and competing non-atherosclerotic death for 55 year old men and women. Hard coronary heart disease was defined as myocardial infarction or death due to coronary heart disease. Other atherosclerotic cardiovascular death included all atherosclerotic cardiovascular mortality other than fatal coronary heart disease or non-haemorrhagic stroke.

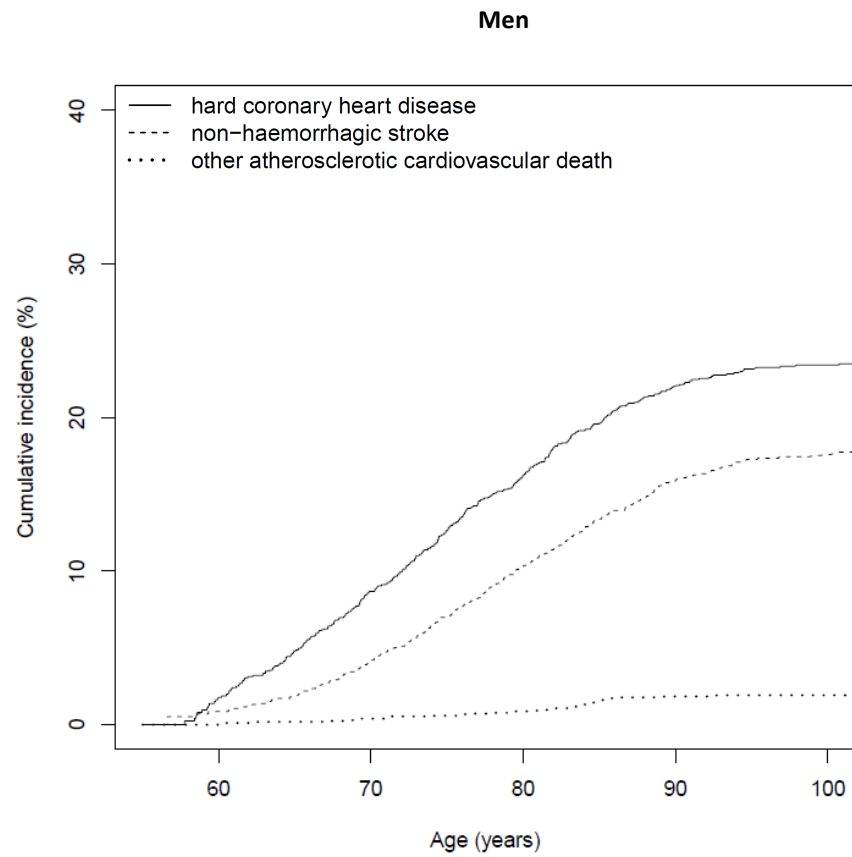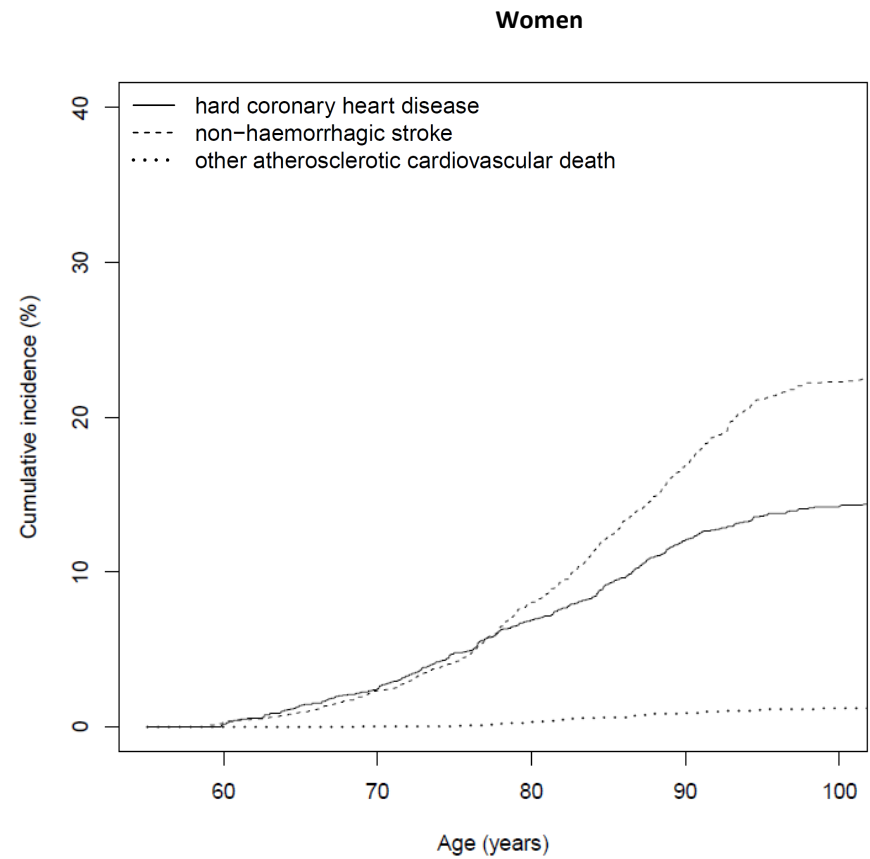

**Fig B** Cumulative incidence of first hard atherosclerotic cardiovascular disease manifestations adjusted for competing non-atherosclerotic death for 55 year old men (left) and women (right). CVD = cardiovascular disease. Hard coronary heart disease was defined as myocardial infarction or death due to coronary heart disease. Other atherosclerotic cardiovascular death included all atherosclerotic cardiovascular mortality other than fatal coronary heart disease or non-haemorrhagic stroke.

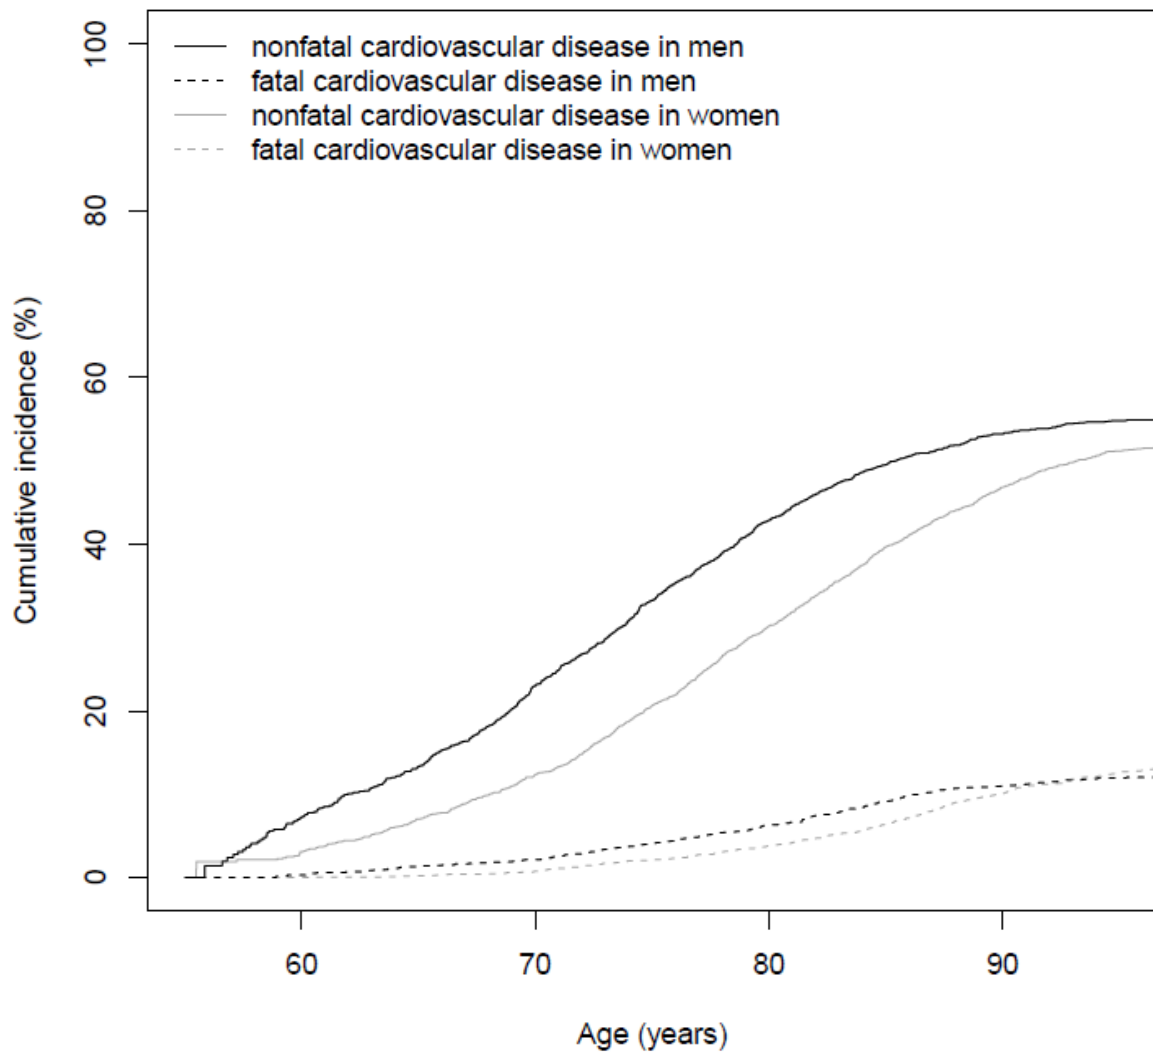

**Fig C** Cumulative incidence of nonfatal and fatal first manifestation of cardiovascular disease (defined as coronary heart disease, cerebrovascular disease, heart failure, and other cardiovascular death) adjusted for competing non-cardiovascular death for 55 year old men and women. Coronary heart disease was defined as myocardial infarction, coronary revascularisation, or death due to coronary heart disease. Cerebrovascular disease was defined as stroke, transient ischaemic attack, or carotid revascularisation. Other cardiovascular death included all cardiovascular mortality other than fatal coronary heart disease or stroke.
